1           **Improved production and expanded application of CVS-N2c-ΔG**  
2                                           **virus for retrograde tracing**

3   Kunzhang Lin<sup>1,2,\*</sup>, Lei Li<sup>2</sup>, Wenyu Ma<sup>2,3</sup>, Xin Yang<sup>2</sup>, Zengpeng Han<sup>1,2,3</sup>, Nengsong  
4   Luo<sup>1,2,4</sup>, Fuqiang Xu<sup>1,2,3,4,5,6,\*</sup>

5   <sup>1</sup> The Brain Cognition and Brain Disease Institute (BCBDI), Shenzhen Key Laboratory  
6   of Viral Vectors for Biomedicine, Shenzhen Institute of Advanced Technology, Chinese  
7   Academy of Sciences; Shenzhen-Hong Kong Institute of Brain Science-Shenzhen  
8   Fundamental Research Institutions, NMPA Key Laboratory for Research and  
9   Evaluation of Viral Vector Technology in Cell and Gene Therapy Medicinal Products,  
10   Shenzhen, Key Laboratory of Quality Control Technology for Virus-Based  
11   Therapeutics, Guangdong Provincial Medical Products Administration, Shenzhen,  
12   518055, P.R. China.

13   <sup>2</sup> Key Laboratory of Magnetic Resonance in Biological Systems, State Key Laboratory  
14   of Magnetic Resonance and Atomic and Molecular Physics, National Center for  
15   Magnetic Resonance in Wuhan, Wuhan Institute of Physics and Mathematics,  
16   Innovation Academy for Precision Measurement Science and Technology, Chinese  
17   Academy of Sciences, Wuhan, 430071, P.R. China.

18   <sup>3</sup> University of Chinese Academy of Sciences, Beijing, 100049, P.R. China.

19   <sup>4</sup> Wuhan National Laboratory for Optoelectronics, Huazhong University of Science and  
20   Technology, Wuhan 430074, P.R. China.

21   <sup>5</sup> Shenzhen-Hong Kong Institute of Brain Science-Shenzhen Fundamental Research  
22   Institutions, Shenzhen, 518055, P.R. China.

23   <sup>6</sup> Center for Excellence in Brain Science and Intelligence Technology, Chinese  
24   Academy of Sciences, Shanghai, 200031, P.R. China.

25

26 \* Corresponding author at: The Brain Cognition and Brain Disease Institute (BCBDI),  
27 Shenzhen Key Laboratory of Viral Vectors for Biomedicine, Shenzhen Institute of  
28 Advanced Technology, Chinese Academy of Sciences; Shenzhen-Hong Kong Institute  
29 of Brain Science-Shenzhen Fundamental Research Institutions, NMPA Key Laboratory  
30 for Research and Evaluation of Viral Vector Technology in Cell and Gene Therapy  
31 Medicinal Products, Shenzhen, Key Laboratory of Quality Control Technology for  
32 Virus-Based Therapeutics, Guangdong Provincial Medical Products Administration,  
33 Shenzhen, 518055, P.R. China.

34 Email address: [kz.lin@siat.ac.cn](mailto:kz.lin@siat.ac.cn) (K. Lin); [fq.xu@siat.ac.cn](mailto:fq.xu@siat.ac.cn) (F. Xu).

35

36

37

38

39

40

41

42

43

44

45

46 **Abstract:**

47 Neurotropic virus tracers, particularly those with low toxicity and high efficient tracing,  
48 are powerful tools for structural and functional dissections of neural circuits. The  
49 retrograde trans-mono-synaptic technology based on rabies virus CVS-N2c strain has  
50 reduced cytotoxicity and enhanced efficiency, attains long-term gene manipulation for  
51 functional studies, but suffers from difficult preparation and low yield. To overcome  
52 these shortcomings, an improved production system was established for rapid rescue  
53 and preparation of CVS-N2c- $\Delta$ G virus, CVS-N2c- $\Delta$ G with the same titer as SAD-B19-  
54  $\Delta$ G can be prepared within a short time. Meanwhile, we found that N2cG coated CVS-  
55 N2c- $\Delta$ G allows efficient retrograde access to projection neurons, and further expand its  
56 application in VTA/SNc to DLS pathway that unaddressed by rAAV9-Retro, and the  
57 efficiency is 6 folds higher than that of rAAV9-Retro. Then the trans-synaptic efficiency  
58 of CVS-N2c- $\Delta$ G virus was evaluated. Results showed that the trans-mono-synaptic  
59 efficiency of oG-mediated CVS-N2c- $\Delta$ G was 2-3 folds higher than that of oG-mediated  
60 SAD-B19- $\Delta$ G, but there was no difference between oG-mediated and N2cG-mediated  
61 CVS-N2c- $\Delta$ G system. In addition, codon modified N2cG (optiG) did not increase the  
62 efficiency of CVS-N2c- $\Delta$ G tracing. Finally, we found that the CVS-N2c- $\Delta$ G produced  
63 by the improved method can be used for monitoring neural activity of projection  
64 neurons, and the time window can be maintained for 3 weeks, and it can also express  
65 sufficient recombinases for efficient transgene recombination. That is, the virus  
66 produced by the improved production system does not affect its own function, paving  
67 the way for its further optimization, popularization and application in structural and

68 functional studies of neural circuits.

69 **Key words:**

70 Neural circuits; retrograde trans-mono-synaptic; CVS-N2c-ΔG; functional studies;

71 improved production system

72

73

74

75

76

77

78

79

80

81

82

83

84

85 **Introduction:**

86 Analyzing the connection of brain neural networks, including input and output neural  
87 pathways, is the basis to reveal the principle of the brain function and elucidate the  
88 mechanism of brain diseases [1]. Structural and functional studies of brain connection  
89 require anterograde and retrograde viral tracers [2-5]. The retrograde trans-mono-  
90 synaptic technology based on rabies virus SAD-B19 strain can label the input network  
91 of specific types of neurons [6, 7], which has been used to solve a large number of  
92 neuroscience problems and has been widely popularized and applied in the field of  
93 neuroscience [8, 9]. However, this system enables trans-mono-synaptic retrograde  
94 labeling only a fraction of upstream neurons, which may lead to the neglect of related  
95 input network connections [10]. Moreover, the high cytotoxicity makes it not conducive  
96 to carrying functional genes for neural activity detection and functional manipulation  
97 for a long time. The chimeric glycoprotein (oG) obtained by codon optimization can  
98 increase the trans-mono-synaptic efficiency of SAD-B19 up to 20 folds [11]. Since then,  
99 many laboratories have used adeno-associated virus expressing oG as an auxiliary  
100 vector to track the upstream input of neural network [12-14]. The self-inactivating  
101 rabies virus (SiR) developed by rapidly degrading the N protein of SAD-B19-ΔG that  
102 related to virus replication, can carry Cre or Flpo recombinase combined with adeno-  
103 associated virus expressing functional probe for the study of functional network [15].  
104 However, it also has some defects, such as complex preparation process, weak self-  
105 expression and unable to express sufficient functional probes. Chatterjee et al reported  
106 non-toxic SAD-B19 (SAD-B19-ΔGL) with double deletion of G and L proteins,

107 however, it has only very weak expression ability, and can only express recombinase to  
108 magnify gene expression (such as AAV virus or transgenic animals equipped with  
109 recombinase-dependent functional probes expression) for the activity monitoring and  
110 genetic manipulation of functional networks [16]. Moreover, due to the large size of L  
111 gene, it is necessary to adopt appropriate helper virus vector strategy or make transgenic  
112 animals expressing L to realize trans-mono-synaptic tracing [16]. Reardon et al.  
113 established a retrograde trans-mono-synaptic system modified by rabies virus CVS-N2c  
114 strain. Through reverse compensation of its own glycoprotein N2cG, CVS-N2c-ΔG  
115 exhibits significantly enhanced retrograde trans-synaptic ability and further reduced  
116 toxicity to neurons compared with SAD-B19-ΔG vaccine strain [10]. CVS-N2c-ΔG can  
117 express functional probes such as calcium-sensitive probes and optogenetic probes for  
118 the analysis of functional network, therefore, it has more advantages in neural circuit  
119 tracing, but also has the disadvantages such as difficult preparation and low yield.  
120 Therefore, it has not been popularized in the following application.

121 Here, to overcome these limitations, we developed a new production system for rapid  
122 rescue and preparation of CVS-N2c-ΔG virus. The CVS-N2c-ΔG virus permits  
123 efficient retrograde labeling of projection neurons unaddressed by rAAV9-Retro, and  
124 maintains excellent performances for retrograde trans-mono-synaptic targeting,  
125 functional monitoring and transgene recombination.

126

## 127 **Results**

### 128 **Optimized preparation method for CVS-N2c-ΔG viruses**

129 CVS-N2c-ΔG exhibits significantly enhanced retrograde trans-synaptic ability and  
130 further reduced toxicity to neurons compared with SAD-B19-ΔG vaccine strain, and it  
131 can express functional probes such as calcium-sensitive probes and optogenetic probes  
132 for the analysis of functional network [10], but it also has the disadvantages of very  
133 prolonged preparation process and low yield. Therefore, it is necessary to establish a  
134 highly efficient preparation method of CVS-N2c-ΔG viruses. Here we provide a new  
135 preparation protocol involving three cell lines as shown in Fig. 1A: 1) "B7GG" cell  
136 line [17], based on BHK-21 cells stably expressing the T7 RNA polymerase, the  
137 nuclear-localized EGFP and the SAD-B19 glycoprotein (B19G), used for the rapid  
138 rescue and amplification of CVS-N2c-ΔG viruses; 2) "BHK-N2cG" cell line (Fig. S1A),  
139 based on BHK-21 cells stably expressing the CVS-N2c glycoprotein (N2cG), along  
140 with the nuclear-localized EGFP, used for the amplification of N2cG coated CVS-N2c-  
141 ΔG viruses; 3) "BHK-EnvARVG" cell line (Fig. S1B), based on BHK-21 cells stably  
142 expressing the EnvA and B19G chimeric glycoprotein (EnvARVG) [6], along with the  
143 nuclear-localized EGFP, used for the amplification of EnvARVG coated CVS-N2c-ΔG  
144 viruses. We found that the CVS-N2c-ΔG virus can be quickly rescued (Fig. 1B). To  
145 evaluate the production performance of these cell lines, we compared the production  
146 efficiency of CVS-N2c-ΔG and SAD-B19-ΔG viruses in these cells, by means of  
147 supernatant titer detection. In B7GG cells, no significant difference was observed in  
148 supernatant titer between CVS-N2c-ΔG and SAD-B19-ΔG viruses (Fig. 1C, SAD-B19:

149  $1.04 \pm 0.26 \times 10^6$  IU/ml; CVS-N2c:  $0.88 \pm 0.30 \times 10^6$  IU/ml;  $P = 0.6978$ ); In BHK-  
150 N2cG cells, the supernatant titer of CVS-N2c- $\Delta$ G was lower than that produced in  
151 B7GG cell line (Fig. 1D, B19G:  $0.88 \pm 0.30 \times 10^6$  IU/ml; N2cG:  $1.04 \pm 0.26 \times 10^5$   
152 IU/ml;  $P = 0.0338$ ). In addition, the SAD-B19- $\Delta$ G virus can also be amplified in this  
153 cell line, and the supernatant titer was also significantly lower than that produced in  
154 B7GG cell line (Fig. 1E, B19G:  $1.04 \pm 0.26 \times 10^6$  IU/ml; N2cG:  $1.24 \pm 0.25 \times 10^5$  IU/ml;  
155  $P = 0.0077$ ). However, there was no significant difference in supernatant titer between  
156 CVS-N2c- $\Delta$ G and SAD-B19- $\Delta$ G produced in the same BHK-N2cG cell line (Fig. 1F,  
157 SAD-B19:  $1.24 \pm 0.25 \times 10^5$  IU/ml; CVS-N2c:  $1.04 \pm 0.26 \times 10^5$  IU/ml;  $P = 0.5917$ ).

158 It was previously reported that Neuro2A-EnvARVG was inefficient in producing CVS-  
159 N2c- $\Delta$ G virus [10], which may be because EnvARVG itself was not suitable for CVS-  
160 N2C- $\Delta$ G virus packaging, and may also be due to the low viability of Neuro2A cells.  
161 To verify whether BHK-EnvARVG cell line can efficiently produce high-titer  
162 EnvARVG coated CVS-N2C- $\Delta$ G, we used high-titer CVS-N2C- $\Delta$ G pseudotyped with  
163 B19G (produced by B7GG cell line) to infect BHK-EnvARVG cells. As shown in Fig.  
164 1F, the supernatant titer was measured and compared with EnvARVG pseudotyped  
165 SAD-B19- $\Delta$ G. No significant difference were detected in supernatant titer between  
166 CVS-N2c- $\Delta$ G and SAD-B19- $\Delta$ G produced in the same BHK-EnvARVG cell line (Fig.  
167 1G, SAD-B19:  $7.46 \pm 1.15 \times 10^5$  IU/ml; CVS-N2c:  $4.88 \pm 0.97 \times 10^5$  IU/ml;  $P = 0.1242$ ),  
168 indicating that BHK-EnvARVG cell line can efficiently prepare high-titer EnvARVG  
169 pseudotyped CVS-N2C- $\Delta$ G virus.

170 These results showed that the optimized preparation method we designed can be used



171 to produce high-quality and high-titer EnvARVG coated CVS-N2c- $\Delta$ G viruses for  
172 retrograde trans-mono-synaptic labeling.

### 173 **Retrograde access to projection neurons with CVS-N2c- $\Delta$ G virus**

174 The retrograde labeling of viral tracers can be used to analyze the upstream neural  
175 networks projected to specific brain regions. N2cG coated SAD-B19- $\Delta$ G has the ability  
176 to efficiently retrograde label the upstream network of specific brain regions along the  
177 axon terminal [18], while CVS-N2c- $\Delta$ G has lower cytotoxicity compared with SAD-  
178 B19- $\Delta$ G [10]. Therefore, if N2cG can endow the CVS-N2c- $\Delta$ G virus with efficient  
179 retrograde labeling, it will be more conducive to structural labeling and functional  
180 manipulation. To evaluate whether N2cG coated CVS-N2c- $\Delta$ G virus can achieve high-  
181 efficiency retrograde labeling projection neurons, 100 nl of the N2cG coated CVS-N2c-  
182  $\Delta$ G virus and CTB-488 (cholera toxin subunit B binding fluorescein 488, used to  
183 indicate the injection site) were mixed and injected into the ventral tegmental area (VTA)  
184 of C57BL/6J adult mice (Fig. 2A), and then local infection and the brain regions  
185 projecting to the VTA were imaged at 7 days post-injection (DPI). We found that N2cG  
186 coated CVS-N2c- $\Delta$ G virus only labeled a small number of neurons *in situ* (Fig. 2B),  
187 mainly retrogradely labeled the upstream brain area of VTA [19], including the  
188 somatomotor areas (MO), anterior cingulate area (ACA), medial preoptic area (MPOA),  
189 anterior hypothalamic nucleus (AHN), lateral habenula (LHb), lateral hypothalamic  
190 area (LHA), zona incerta (ZI), dorsal raphe nucleus (DR), and parabrachial nucleus  
191 (PB), among others (Fig. 2C), indicating the N2cG coated CVS-N2c- $\Delta$ G virus allows  
192 efficient retrograde access to projection neurons.

193 **Transduction efficiency of CVS-N2c-ΔG virus in VTA/SNc to DLS pathway**

194 In order to exhibit that N2cG coated CVS-N2c-ΔG virus allows efficiently retrograde  
195 access to projection neurons difficult to label with other tools, we compared its  
196 efficiency with another retrograde viral tracers, rAAV9-Retro, which can retrogradely  
197 infect projection neurons with an efficiency comparable to that of AAV2-Retro [20].  
198 AAV2-Retro and rAAV9-Retro exhibit robust retrograde functionality in certain neural  
199 circuits, but they have brain region selectivity, and have weak labeling efficiency in  
200 projection neurons from the ventral tegmental area and substantia nigra pars compacta  
201 (VTA/SNc) to dorsal lateral striatum (DLS) [20-22]. N2cG coated CVS-N2c-ΔG-  
202 tdTomato and rAAV9-Retro-CAG-EGFP were mixed (volume ratio of 1:1, 200 nL per  
203 mouse) and injected into the CPu (DLS) of C57BL/6J adult mice (Fig. 3A), and then  
204 local infection and the VTA/SNc region projecting to the DLS were imaged at 14 days  
205 post-injection (DPI). We found that rAAV9-Retro showed weak EGFP expression in  
206 VTA/SN. In contrast, N2cG coated CVS-N2c-ΔG robustly drove tdTomato expression  
207 in projection neurons in VTA/SNc (Fig. 3B), demonstrating its efficient retrograde  
208 transport in VTA/SNc to DLS pathway. Importantly, significant statistical difference  
209 between rAAV9-Retro and CVS-N2c-ΔG was found in the total number of positive  
210 neurons in VTA/SNc (Fig. 3C,  $38.33 \pm 0.88$  for rAAV9-Retro,  $262.30 \pm 4.06$  for CVS-  
211 N2c-ΔG;  $P < 0.0001$ ). These results indicate that the N2cG coated CVS-N2c-ΔG allows  
212 efficient retrograde access to projection neurons unaddressed by rAAV9-Retro, and the  
213 efficiency is 6 folds higher than that of rAAV9-Retro.

214 **Establishment and efficiency comparison of retrograde trans-mono-synaptic**  
215 **systems**

216 Rabies virus strains from different sources combined with different glycoproteins may  
217 have different trans-synaptic efficiency or other infection tropism. The codon optimized  
218 chimeric glycoprotein (oG) derived from Pasteur strain of rabies virus can greatly  
219 improve trans-mono-synaptic tracing efficiency of SAD-B19- $\Delta$ G [11], so the retrograde  
220 trans-mono-synaptic system based on SAD-B19- $\Delta$ G/oG has been widely used to track  
221 the upstream input of neural networks. However, whether oG can enhance CVS-N2c-  
222  $\Delta$ G trans-mono-synaptic spread efficiency is still unknown. Therefore, it is necessary  
223 to compare different retrograde trans-mono-synaptic systems, as shown in Fig. 4, which  
224 mainly include rabies virus systems with deletion of glycoproteins and adeno-  
225 associated virus helper virus systems that compensate TVA for specific infection and  
226 glycoproteins for trans-mono-synaptic tracing. To verify whether oG can enhance CVS-  
227 N2c- $\Delta$ G trans-mono-synaptic spread efficiency, we used two helper viruses (AAVs)  
228 introduced in trans, one to complement the oG and the other to express TVA. They were  
229 mixed and injected into the ventral hippocampal region (vHPC) of Thy1-Cre transgenic  
230 mice. After 3 weeks of infection, CVS-N2c- $\Delta$ G and SAD-B19- $\Delta$ G was injected at the  
231 same site respectively. Seven days later, the brain slices were processed and imaged by  
232 slide scanner (Fig. 5A). We found that a number of nuclear GFP and dsRed neurons  
233 were co-labeled (starter cells) within vHPC (Fig. 5B), and rabies viruses could  
234 efficiently trans-mono-synaptic transduce the contralateral ventral hippocampal region  
235 (Fig. 5C and Fig. 5D). The trans-mono-synaptic tracing efficiency of rabies was

236 evaluated through the convergence index, which is calculated as the number of dsRed<sup>+</sup>  
237 input neurons divided by the number of GFP<sup>+</sup> dsRed<sup>+</sup> starter neurons [11]. Results  
238 showed that the trans-mono-synaptic efficiency of oG-mediated CVS-N2c-ΔG was 2-  
239 3 fold higher than that of oG-mediated SAD-B19-ΔG (Fig. 5E, CVS-N2c-ΔG/oG:  
240  $1.87 \pm 0.16$ ; SAD-B19-ΔG/oG:  $0.60 \pm 0.06$ ;  $P = 0.0014$ ).

241 Using the same method, we compared the trans-mono-synaptic efficiency of CVS-N2c-  
242 ΔG/oG and CVS-N2c-ΔG/N2cG. The schematic diagram of virus injection is shown in  
243 Fig. S2A, a number of starter cells were labeled in vHPC (Fig. S2B), and CVS-N2c-  
244 ΔG/N2cG could also efficiently trans-mono-synaptic transduce the contralateral ventral  
245 hippocampal region (Fig. S2C). Quantitative analysis showed that the retrograde trans-  
246 mono-synaptic efficiency of CVS-N2c-ΔG/oG was equivalent to that of CVS-N2c-  
247 ΔG/N2cG (Fig. S2D, CVS-N2c-ΔG/oG:  $1.87 \pm 0.16$ ; CVS-N2c-ΔG/N2cG:  $1.95 \pm 0.15$ ;  
248  $P = 0.7337$ ). However, oG is a codon optimized chimeric glycoprotein. Whether  
249 optimized N2cG (optiG) can further improve the trans-mono-synaptic efficiency of the  
250 CVS-N2c-ΔG virus is still unknown. We compared the trans-mono-synaptic efficiency  
251 of CVS-N2c-ΔG/N2cG and CVS-N2c-ΔG/optiG using D2R-Cre transgenic mice. The  
252 viruses were injected into the CPu region of D2R-Cre transgenic mice (Fig. S3A). A  
253 number of co-labeled signals could be observed at the injection site (Fig. S3B), and  
254 both CVS-N2c-ΔG/N2cG and CVS-N2c-ΔG/optiG could retrograde trans-mono-  
255 synaptic label a large number of neurons in the cortex (Fig. S3C and Fig. S3D), which  
256 was consistent with the previous report [10]. In addition, both trans-mono-synaptic  
257 systems can also efficiently retrograde target the amygdala and thalamus (Fig. S4A and

258 Fig. S4C), the main inputs of CPu area. Through quantitative analysis, we found that  
259 the convergence indices had no significant difference in both amygdala (Fig. S4B, BLA,  
260 N2cG:  $1.01 \pm 0.37$ ; optiG:  $0.80 \pm 0.19$ ;  $P = 0.6211$ ) and thalamus (Fig. S4D, TH, N2cG:  
261  $3.96 \pm 0.81$ ; optiG:  $4.98 \pm 1.56$ ;  $P = 0.5850$ ), respectively, indicating that optiG could  
262 not improve the trans-mono-synaptic efficiency of CVS-N2c-ΔG.

### 263 **CVS-N2c-ΔG virus for monitoring neural activity**

264 While CVS-N2c-ΔG exhibits reduced toxicity to neurons compared with SAD-B19-ΔG  
265 vaccine strain, and can be used for long-term neuronal activity monitoring of labeled  
266 circuit in vivo, it still has some neurotoxicity, and the time for monitoring neural activity  
267 is 17 days longest tested [10]. Therefore, it is essential to evaluate the functional  
268 characteristics of viruses produced by a new method. To evaluate whether projection  
269 neurons transduced with the N2cG coated CVS-N2c-ΔG vector retained the properties  
270 for monitoring neural activity, and to determine the time window it maintains for  
271 function detection, we established CVS-N2c-ΔG-GCaMP6s viral vector and conducted  
272 in vivo response monitoring of calcium transients of reward circuits at different time  
273 points. The projection neurons from the ventral tegmental area (VTA) to nucleus  
274 accumbens (NAc) are involved in "reward circuits" [23], we performed fiber  
275 photometry in this projection pathway (Fig. 6A), and used 5% sugar water as reward.  
276 We injected N2cG coated CVS-N2c-ΔG-GCaMP6s vector into NAc and detected the  
277 change of calcium signals in VTA when mice were rewarded with sugar water (Fig. 6A,  
278 B). We found that the projection pathway could be labeled by GCaMP6s (Fig. 6C, D)  
279 and activated only when mice licked sugar water at different time points (Fig. 6E-G, 7,  
280 14 and 21 days post infection). These results indicate that the N2cG coated CVS-N2c-  
281 ΔG can be used for monitoring neural activity of projection neurons, and the time  
282 window can be maintained for at least 21 days.

## 283 **CVS-N2c-ΔG expressing recombinase for transgene recombination**

284 Recombinant enzyme mediated gene expression or manipulation plays an important  
285 role in the study of neural circuit structure and function [16]. In order to verify whether  
286 the CVS-N2c-ΔG virus produced by using the new method can effectively express  
287 recombinant enzyme for the recombination of Cre or Flpo induced genes. For Cre-  
288 mediated recombination, Cre-conditional rAAV expressing EGFP (rAAV-DIO-EGFP)  
289 was injected into the primary motor cortex (M1) of C57BL/6J adult mice, followed by  
290 injection of CVS-N2c-ΔG-mCherry-2A-Cre at the contralateral M1 (Fig. 7A); For  
291 Flpo-mediated recombination, Flpo-conditional rAAV expressing EGFP (rAAV-FDIO-  
292 EGFP) was injected into the primary motor cortex (M1) of C57BL/6J adult mice,  
293 followed by injection of CVS-N2c-ΔG-mCherry-2A-Flpo at the contralateral M1 (Fig.  
294 7C). We found that both CVS-N2c-ΔG-mCherry-2A-Cre and CVS-N2c-ΔG-mCherry-  
295 2A-Flpo could transport retrogradely and drive EGFP expression of AAV, and the green  
296 fluorescence signals co-labeled with the red fluorescence signals (Fig. 7B and Fig. 7D).  
297 These results indicate that CVS-N2c-ΔG virus produced by using the new method can  
298 express sufficient recombinases for efficient transgene recombination, consistent with  
299 previous reports.

## 300 **Discussion**

301 Neurotropic virus tracers, especially those with low toxicity or high efficient tracing,  
302 contribute to the analysis of the anatomical structure and function of neural circuits [10,  
303 16]. The retrograde trans-mono-synaptic system based on the transformation of rabies

304 virus CVS-N2c strain has reduced cytotoxicity and improved trans-synaptic efficiency  
305 compared with the traditional SAD-B19 trans-mono-synaptic system [10], but it has not  
306 been further popularized in the field of neuroscience, mainly due to the defect of  
307 difficult preparation and low titer. To overcome these shortcomings, a new production  
308 system was established for rapid rescue and preparation of CVS-N2c- $\Delta$ G virus. The  
309 CVS-N2c- $\Delta$ G virus allows efficient retrograde access to projection neurons  
310 unaddressed by rAAV9-Retro, and maintains excellent performances for retrograde  
311 trans-mono-synaptic targeting, functional monitoring and transgene recombination.

312 CVS-N2c is highly neuroinvasive and can be rapidly transduced in the nervous system  
313 [24]. The previously reported preparation process of RVG deleted CVS-N2c virus  
314 mainly uses the cell line established by Neuro2a, which is not easy to culture [10]. It  
315 takes a long time to screen the cell line, and the amplification efficiency using its own  
316 glycoprotein is low, which often leads to low virus production efficiency. Alternative  
317 methods need to be found to produce RVG deleted CVS-N2c virus. However, high titer  
318 SAD-B19 virus is mainly produced by BHK-21 cells that are easy to culture and  
319 transduce [25]. Therefore, the cell line derived from BHK-21 may be able to quickly  
320 rescue and expand CVS-N2c- $\Delta$ G. In order to prove this phenomenon, CVS-N2c- $\Delta$ G  
321 was rescued in B7GG cell line, and obvious virus fluorescence signals could be  
322 observed on the fifth day, and it could be amplified rapidly. The supernatant titer can  
323 reach the level of SAD-B19- $\Delta$ G, and the preparation time is 10 ~ 14 days, indicating  
324 that B7GG cell line can quickly rescue and prepare CVS-N2c- $\Delta$ G virus. When infected  
325 with BHK-N2cG cell line, CVS-N2c- $\Delta$ G virus could also be amplified, but the titer of

326 supernatant was significantly lower than that produced by B7GG cell line, indicating  
327 that B7GG cell line is more suitable for high titer production of CVS-N2c-ΔG virus. In  
328 addition, the supernatant titers of EnvARVG pseudotyped CVS-N2c-ΔG and SAD-  
329 B19-ΔG viruses prepared by BHK-EnvARVG cell line had no significant difference,  
330 indicating that BHK-EnvARVG cell line can prepare EnvARVG pseudotyped CVS-  
331 N2c-ΔG virus with high titer, which is inconsistent with the previously reported low  
332 production efficiency of CVS-N2c-ΔG pseudotyped with EnvARVG [10], which may  
333 be related to Neuro2a cell line that are not easy to culture. The production time of  
334 EnvARVG pseudotype CVS virus is 5 ~ 7 days. Therefore, this new method greatly  
335 shortens the preparation cycle of CVS-N2c-ΔG virus.

336 Some viral vectors have been used as retrograde tracers to label and manipulate neurons  
337 projected to a specific brain region. Sun et al. [26] and Zhu et al. [18] reported in detail  
338 the retrograde labeling efficiency of various viral tracers, including PRV, RV-B2C,  
339 AAV2-Retro and N2cG pseudotyped SAD-B19, and found that they have different  
340 retrograde labeling efficiency and brain region selectivity. The brain area targeting of  
341 N2cG pseudotyped SAD-B19 is more broad-spectrum than that of AAV2 retro, and the  
342 retrograde labeling efficiency of N2cG pseudotyped SAD-B19 is more than one order  
343 of magnitude higher than that of RV packaged with B19G, providing a valuable  
344 reference for the selection and use of tool viruses [18]. CVS-N2c has lower cytotoxicity  
345 than SAD-B19, therefore, if N2cG encapsulated CVS-N2c-ΔG virus permits efficient  
346 retrograde access to projection neurons, which will be more conducive to structural  
347 labeling and functional manipulation. We found that N2cG coated CVS-N2c-ΔG allows



348 efficient retrograde access to projection neurons, and further expand its application in  
349 VTA/SNc to DLS pathway that unaddressed by rAAV9-Retro, and the efficiency is 6  
350 folds higher than that of rAAV9-Retro. In future studies, we will use this viral tracer to  
351 trace and manipulate more neural circuits that cannot be resolved by other viral tracers.  
352 The reported efficient retrograde trans-mono-synaptic systems mainly include CVS-  
353 N2c- $\Delta$ G/N2cG [10] and SAD-B19- $\Delta$ G/oG [11], but the trans-synaptic efficiency of  
354 CVS-N2c- $\Delta$ G mediated by oG and modified N2cG (optiG) is unknown. In order to  
355 answer this question, A variety of retrograde trans-mono-synaptic systems were  
356 established by combining different rabies virus systems with different sources of RVG,  
357 and the efficiency was compared in the nervous system of mice. Results showed that  
358 the trans-mono-synaptic efficiency of oG-mediated CVS-N2c- $\Delta$ G was 2-3 folds higher  
359 than that of oG-mediated SAD-B19- $\Delta$ G, but there was no difference between oG-  
360 mediated and N2cG-mediated CVS-N2c- $\Delta$ G system. In addition, codon modified  
361 N2cG (optiG) did not increase the efficiency of CVS-N2c- $\Delta$ G tracing. Therefore,  
362 retrograde trans-mono-synaptic system using oG-mediated or N2cG-mediated CVS-  
363 N2c- $\Delta$ G is conducive to analyze more comprehensive input network. It should be noted  
364 that other RVG from different sources not included here may also further improve the  
365 trans-mono-synaptic efficiency of the virus, more comparative studies are needed later.  
366 In addition, the trans-mono-synaptic efficiency of CVS-N2c- $\Delta$ G/oG is higher than that  
367 of SAD-B19- $\Delta$ G/oG, which may be because oG is easier to package CVS-N2c- $\Delta$ G  
368 virus, or CVS-N2c- $\Delta$ G virus is less toxic, which is more conducive to the maintenance  
369 of nerve cells and the trans-mono-synaptic transmission of CVS-N2c- $\Delta$ G virus. The

370 relevant mechanism needs to be further studied. Then, oG can be constructed into  
371 lentivirus vector, packaged into lentivirus, infected with BHK-21 and other cells to  
372 establish a stable cell line, which may be useful to more efficiently package or prepare  
373 CVS-N2c- $\Delta$ G virus, and what are the labeling characteristics of the packaged  
374 pseudovirus in vivo? It is also a problem worthy of study.

375 Finally, we found that the CVS-N2c- $\Delta$ G produced by the new method can be used for  
376 monitoring neural activity of projection neurons, and the time window can be  
377 maintained for 3 weeks, which is at least consistent with the previous report (up to 17  
378 days) [10]. In addition, CVS-N2c- $\Delta$ G virus produced using the new method can express  
379 sufficient recombinases for efficient transgene recombination, which is also consistent  
380 with previous reports [10]. Therefore, the virus produced by the new method does not  
381 affect its own function, paving the way for its further optimization and application in  
382 neural circuit.

383 In summary, this work provides improved production method and expanded  
384 application of CVS-N2c- $\Delta$ G virus, which will contribute to the popularization and  
385 application of CVS-N2c- $\Delta$ G virus for structural and functional studies of neural circuits.

386

## 387 **Materials and methods**

### 388 **Establishment of stable cell lines for virus packaging**

389 BHK-21 cells stably expressing either N2cG or EnvARVG (a chimeric protein made

390 from EnvA and the tail of B19G) fused with nuclear localized EGFP were created. H2B-  
391 GFP-P2A-N2cG and H2B-GFP-P2A-EnvARVG fragments were cloned into lentivirus  
392 expression vector FUGW (addgene#14883) by homologous recombination kit (Vazyme  
393 company), and FUGW-H2B-GFP-P2A-N2cG and FUGW-H2B-GFP-P2A-EnvARVG  
394 vectors were obtained and transfected into HEK-293T with pMDLg/pRRE  
395 (addgene#12251), pRSV-Rev (addgene#12253), and pMD2.G (addgene#12259). Viral  
396 supernatants were collected at 48 and 72 hours post transfection and after filtering used  
397 to transduce BHK-21 cells at a multiplicity of infection (MOI) of 5. Three days post  
398 transduction, the green fluorescence ratio reached more than 90%, then the cells were  
399 passaged for 5 times and stored in liquid nitrogen. The resulting cell lines based on  
400 BHK-21 are named BHK-N2cG and BHK-EnvARVG.

#### 401 **Vectors construction**

402 The optiG was codon optimized from N2cG for *M. musculus* (Genscript). It was cloned  
403 into pAAV-Ef1a-DIO-H2B-GFP-P2A-N2cG plasmid (addgene#73476) to replace  
404 N2cG to obtain pAAV-Ef1a-DIO-H2B-GFP-P2A-optiG plasmid. To construct CVS-  
405 N2c- $\Delta$ G-GCaMP6s plasmid, calcium-sensitive probe GCaMP6s was synthesized and  
406 inserted into CVS-N2c- $\Delta$ G-tdTomato (addgene#73462) digested by the restriction  
407 enzymes SmaI and NheI (New England Biolabs).

#### 408 **Rescue and preparation of rabies viral vectors**

409 SAD-B19- $\Delta$ G-DsRed was rescued and prepared according to a previously reported  
410 method [17, 25]. B7GG cells were used for the rapid rescue and amplification of CVS-

411 N2c-ΔG viruses. B7GG cells were cultured in good growth state, digested with 0.25%  
412 trypsin for 2 minutes, passaged to 6-well plates followed by adding 2 ML Dulbecco's  
413 minimum essential media (DMEM) containing 10% fetal bovine serum (FBS), then  
414 cultured in 37 °C 5% CO<sub>2</sub> incubator overnight. When the cell density in the 6-well plate  
415 reaches 80%, rescue was performed in the cells by co-transfection (Fugene 6  
416 transfection reagent) of CVS-N2c-ΔG genomic plasmid, pCAG-B19P, pCAG-B19N,  
417 pCAG-B19L and pCAG-B19G. 3-5 days post transfection, fluorescence signals of the  
418 virus were observed, indicating that the virus was rescued successfully, then the cells  
419 were passaged to amplify CVS-N2c-ΔG virus pseudotyped with B19G in culture  
420 conditions of 35 °C and 3% CO<sub>2</sub>. The period of B19G pseudotyped CVS-N2c-ΔG virus  
421 rescue and amplification was 10 ~ 14 days. Amplification of N2cG coated CVS-N2c-  
422 ΔG virus was performed by adding amplified supernatant of B19G pseudotyped CVS-  
423 N2c-ΔG to BHK-N2cG cells. The production cycle of N2cG coated CVS-N2c-ΔG virus  
424 is 5 ~ 7 days. Amplification of EnvARVG pseudotyped CVS-N2c-ΔG virus was  
425 performed by adding amplified supernatant of B19G pseudotyped CVS-N2c-ΔG to  
426 BHK-EnvARVG cells. The production cycle of EnvARVG pseudotyped CVS-N2c-ΔG  
427 virus is 5 ~ 7 days.

428 The supernatants were collected and filtered with 0.22 μm membrane, then centrifuged  
429 at 50000×g for 2.5 h at 4 °C. The precipitation was suspended with 1 mL PBS and then  
430 concentrated and purified with 20% sucrose for the second time. The precipitation was  
431 suspended with appropriate amount of PBS. The titer was determined by 10 fold  
432 gradient dilution method ( $10^0 \sim 10^{-6}$ ), and the virus was stored at - 80 °C until use.

433 Titers of N2cG-enveloped or B19G-pseudotyped viruses were tested using HEK-293T  
434 cells; Titers of EnvARVG-pseudotyped viruses were tested using HEK293T-TVA800  
435 cells [27]. Titers of CVS-N2c-ΔG viruses (infectious units per mL, IU/mL) were  $10^7$  –  
436  $10^8$  for N2cG-enveloped and  $10^8$  –  $10^9$  for B19G- and EnvARVG-pseudotyped. The  
437 rabies virus genome plasmids include CVS-N2c-ΔG-tdTomato (addgene#73462),  
438 CVS-N2c-ΔG-mCherry-2A-Cre (addgene#73472) and CVS-N2c-ΔG-mCherry-2A-  
439 Flpo (addgene#73471). These rabies viral vectors can be purchased from the BrainCase  
440 (ShenZhen, China).

#### 441 **Production of adeno-associated viruses**

442 AAV vectors were produced in HEK-293T cells cotransfected with pRep2Cap9 and  
443 pAdDeltaF6 (addgene#112867) using polyethylenimine (PEI-MAX), and then purified  
444 by iodixanol gradient ultracentrifugation [28]. The purified AAV vectors were titered  
445 by qPCR using the iQ SYBR Green Supermix kit (Bio–Rad). AAV vectors were stored  
446 at  $-80$  °C, and the titers were diluted to  $2 \times 10^{12}$  viral genomes/mL (VG/mL) with  
447 phosphate-buffered saline (PBS) before use, respectively. AAV vectors include rAAV-  
448 Efla-DIO-TVA (BrainCase), rAAV-Efla-DIO-H2B-GFP-P2A-oG (addgene#74289),  
449 rAAV-Efla-DIO-H2B-GFP-P2A-N2cG (addgene#73476) and rAAV-Efla-DIO-H2B-  
450 GFP-P2A-optiG. rAAV9-Retro-CAG-EGFP viral vector ( $1.0 \times 10^{13}$  VG/mL) was  
451 purchased from the BrainCase (ShenZhen, China).

#### 452 **Animals**

453 Adult male (8–10 weeks old) C57BL/6J mice (Hunan SJA Laboratory Animal

454 Company), Thy1-Cre and D2R-Cre transgenic mice were used for all experiments.  
455 Among them, Thy1-Cre transgenic mice were presented by professor Duan Shumin  
456 Laboratory (Zhejiang University); D2R-Cre transgenic mice were presented by  
457 researcher Xiong Zhiqi Laboratory (Institute of Neuroscience, Chinese Academy of  
458 Sciences). The mice were housed in the appropriate environment with a 12/12-h  
459 light/dark cycle, and water and food were supplied *ad libitum*. Through cross breeding  
460 with C57BL/6J mice in SPF level animal room, the offspring of transgenic mice  
461 identified as positive by gene identification were used for the experiments. All surgical  
462 and experimental procedures were performed in accordance with the guidelines  
463 formulated by the Animal Care and Use Committee of the Innovation Academy for  
464 Precision Measurement Science and Technology, Chinese Academy of Sciences.

#### 465 **Virus injection**

466 All the experiments related to AAV and RV viruses were performed in Biosafety Level-  
467 2 (BSL-2) laboratory. The stereotactic injection coordinates were selected according to  
468 Paxinos and Franklin's *The Mouse Brain in Stereotaxic Coordinates*, 4th edition [29].  
469 The stereotactic coordinates for VTA were as follows: anterior-posterior-axis (AP): -  
470 3.20 mm; medial-lateral-axis (ML):  $\pm 0.45$  mm; dorsal-ventral-axis (DV): - 4.30 mm  
471 from bregma. The stereotactic coordinates for vHPC were as follows: AP: - 3.16 mm;  
472 ML:  $\pm 2.95$  mm; and DV: - 4.10 mm from bregma. The stereotactic coordinates for CPu  
473 were as follows: AP: + 0.38 mm; ML:  $\pm 2.00$  mm; DV: - 3.50 mm from bregma. Eight-  
474 to ten-week-old C57BL/6J mice and transgenic mice (20–25 g) were used for virus  
475 injection, and the standard injection process was performed as previously reported [18].

476 In the test of transsynaptic tracing, EnvARVG-pseudotyped rabies virus ( $3 \times 10^8$  IU/mL,  
477 100 nL per mouse) was injected at the same site 3 weeks after the injection of AAV  
478 helper viruses (TVA: RVG, volume ratio of 1:2, 150 nL per mouse), and the mice were  
479 sacrificed at 7 days post-injection using the conventional cardiac perfusion method. For  
480 retrograde tracing, the used titer of N2cG coated CVS-N2c- $\Delta$ G-tdTomato was  $1 \times 10^8$   
481 IU/mL, and the used titer of N2cG coated CVS-N2c- $\Delta$ G-GCaMP6s was  $3 \times 10^7$  IU/mL.

### 482 **Slice preparation and imaging**

483 Slice preparation and imaging were accomplished according to previously reported  
484 methods [20]. After soaked with 4% paraformaldehyde solution overnight, dehydration  
485 of mice brains was performed with 30% sucrose solution at 37 °C, then the coronal  
486 sections (thickness of 40  $\mu$ m) of brains were completed by using a microtome (Thermo  
487 Fisher Scientific), and collected in anti-freeze fluid at 200- $\mu$ m intervals. The brain slices  
488 were washed 3 times with phosphate-buffered saline (PBS) for 5 minutes each time.  
489 After 4',6-diamidino-2-phenylindole (DAPI) staining (diluted at 1:3000) for 10 minutes,  
490 the brain slices were washed 3 times with PBS for 5 minutes each time, and applied  
491 neatly on microscope slides, followed by sealing with 70% glycerol. Imaging was  
492 performed using an Olympus VS120 Slide Scanner microscope (Olympus, Japan).

### 493 **Fiber photometry for neural activity recording**

494 N2cG coated CVS-N2c- $\Delta$ G-GCaMP6s (150 nL) was injected into the NAc area, and  
495 optical fiber (core diameter: 200  $\mu$ m, numerical aperture: 0.37, Inper, China) was  
496 implanted into the VTA area, then the change of calcium signals was detected in VTA

497 when mice were rewarded with sugar water at different time points (7, 14 and 21 days  
498 post infection). Before recording the change of calcium signals, the mice were touched  
499 gently for 5 min/day at least 3 days, then habituated to a chamber and the fiber patch  
500 cord (20×20×22 cm) for 10 min. All mice were water-deprived for more than 24 h until  
501 they were placed in the chamber equipped with a cup, which was filled with 5 % (w/v)  
502 sucrose solution. Then the mice were tested when given sucrose rewards. Calcium  
503 transients in VTA during reward behavior were recorded by using a fiber photometry  
504 system (ThinkerTech, Nanjing, China) to excite GCaMP6s at 470 nm wavelength. For  
505 each trial, fluorescence signals from GCaMP6s were normalized by calculating z-scores  
506 as  $\Delta F/F$  signals, where the mean and standard error of mean (SEM) was taken from a  
507 2-s baseline acquisition period preceding sugar water delivery. Data were analyzed  
508 using MATLAB (MathWorks) code and Prism (GraphPad software).

## 509 **Abbreviations**

510 AAV: adeno-associated virus; PBS: phosphate-buffered saline; VG: viral genomes; IU:  
511 infectious units; DAPI: 4',6-diamidino-2-phenylindole; CPu: caudate putamen  
512 (striatum); VTA: ventral tegmental area; vHPC: ventral hippocampus; MO:  
513 somatomotor areas; ACA: anterior cingulate area; MPOA: medial preoptic area; AHN:  
514 anterior hypothalamic nucleus; LHb: lateral habenula; LHA: lateral hypothalamic area;  
515 ZI: zona incerta; DR: dorsal raphe nucleus; PB: parabrachial nucleus; SNr: substantia  
516 nigra pars compacta; BLA: basolateral amygdalar nucleus; TH: thalamus.



517 **Competing interests**

518 The authors declare that there are no conflicts of interest between them.

519 **Authors' contributions**

520 KL and FX contributed to the study idea and design; KL and FX contributed to funding  
521 acquisition and resources; KL, LL, WM, XY and NL performed the experiments and  
522 data acquisition; KL, LL, WM and ZH performed the data analysis; KL and FX drafted  
523 the manuscript and contributed to its review and editing. All authors read and approved  
524 the final manuscript.

525 **Acknowledgements**

526 This work was supported by the National Natural Science Foundation of China  
527 (32100899, 31830035, 31771156, 21921004), the Key-Area Research and  
528 Development Program of Guangdong Province (2018B030331001), the Strategic  
529 Priority Research Program of the Chinese Academy of Sciences (XDB32030200) and  
530 the Shenzhen Key Laboratory of Viral Vectors for Biomedicine  
531 (ZDSYS20200811142401005). Schematic diagrams of the process in the figures (figure  
532 1, 2, 3, 6, 7) of this article were created with BioRender.com.

533 **References**

- 534 1. Insel TR. Rethinking schizophrenia. *Nature*. 2010;468(7321):187-193.
- 535 2. Li J, Liu T, Dong Y, Kondoh K and Lu Z. Trans-synaptic Neural Circuit-Tracing with  
536 Neurotropic Viruses. *Neurosci Bull*. 2019;35(5):909-920.
- 537 3. Smith BN, Banfield BW, Smeraski CA, Wilcox CL, Dudek FE, Enquist LW, et al. Pseudorabies

- 538 virus expressing enhanced green fluorescent protein: A tool for in vitro electrophysiological  
539 analysis of transsynaptically labeled neurons in identified central nervous system circuits.  
540 Proceedings of the National Academy of Sciences of the United States of America.  
541 2000;97(16):9264-9269.
- 542 4. Saleeba C, Dempsey B, Le S, Goodchild A and McMullan S. A Student's Guide to Neural Circuit  
543 Tracing. Front Neurosci. 2019;13:897.
- 544 5. Lin K, Zhong X, Ying M, Li L, Tao S, Zhu X, et al. A mutant vesicular stomatitis virus with  
545 reduced cytotoxicity and enhanced anterograde trans-synaptic efficiency. Mol Brain.  
546 2020;13(1):45.
- 547 6. Wickersham IR, Lyon DC, Barnard RJ, Mori T, Finke S, Conzelmann KK, et al. Monosynaptic  
548 restriction of transsynaptic tracing from single, genetically targeted neurons. Neuron.  
549 2007;53(5):639-47.
- 550 7. Wickersham IR, Finke S, Conzelmann KK and Callaway EM. Retrograde neuronal tracing with  
551 a deletion-mutant rabies virus. Nat Methods. 2007;4(1):47-9.
- 552 8. Xiao Q, Zhou X, Wei P, Xie L, Han Y, Wang J, et al. A new GABAergic somatostatin projection  
553 from the BNST onto accumbal parvalbumin neurons controls anxiety. Mol Psychiatry.  
554 2021;26(9):4719-4741.
- 555 9. Schwarz LA, Miyamichi K, Gao XJ, Beier KT, Weissbourd B, DeLoach KE, et al. Viral-genetic  
556 tracing of the input-output organization of a central noradrenaline circuit. Nature.  
557 2015;524(7563):88-92.
- 558 10. Reardon TR, Murray AJ, Turi GF, Wirblich C, Croce KR, Schnell MJ, et al. Rabies Virus CVS-  
559 N2c(DeltaG) Strain Enhances Retrograde Synaptic Transfer and Neuronal Viability. Neuron.  
560 2016;89(4):711-24.
- 561 11. Kim EJ, Jacobs MW, Ito-Cole T and Callaway EM. Improved Monosynaptic Neural Circuit  
562 Tracing Using Engineered Rabies Virus Glycoproteins. Cell Rep. 2016;15(4):692-699.
- 563 12. Szőnyi A, Sos KE, Nyilas R, Schlingloff D, Domonkos A, Takács VT, et al. Brainstem nucleus  
564 incertus controls contextual memory formation. Science. 2019;364(6442).
- 565 13. Szőnyi A, Zichó K, Barth AM, Gönczi RT, Schlingloff D, Török B, et al. Median raphe controls  
566 acquisition of negative experience in the mouse. Science. 2019;366(6469).
- 567 14. Hafner G, Witte M, Guy J, Subhashini N, Fenno LE, Ramakrishnan C, et al. Mapping Brain-  
568 Wide Afferent Inputs of Parvalbumin-Expressing GABAergic Neurons in Barrel Cortex Reveals  
569 Local and Long-Range Circuit Motifs. Cell Rep. 2019;28(13):3450-3461.e8.
- 570 15. Ciabatti E, Gonzalez-Rueda A, Mariotti L, Morgese F and Tripodi M. Life-Long Genetic and  
571 Functional Access to Neural Circuits Using Self-Inactivating Rabies Virus. Cell.  
572 2017;170(2):382-392 e14.
- 573 16. Chatterjee S, Sullivan HA, MacLennan BJ, Xu R, Hou Y, Lavin TK, et al. Nontoxic, double-  
574 deletion-mutant rabies viral vectors for retrograde targeting of projection neurons. Nat Neurosci.  
575 2018;21(4):638-646.

- 576 17. Osakada F, Mori T, Cetin AH, Marshel JH, Virgen B and Callaway EM. New rabies virus  
577 variants for monitoring and manipulating activity and gene expression in defined neural circuits.  
578 *Neuron*. 2011;71(4):617-31.
- 579 18. Zhu X, Lin K, Liu Q, Yue X, Mi H, Huang X, et al. Rabies Virus Pseudotyped with CVS-N2C  
580 Glycoprotein as a Powerful Tool for Retrograde Neuronal Network Tracing. *Neurosci Bull*.  
581 2020;36(3):202-216.
- 582 19. Montardy Q, Zhou Z, Lei Z, Liu X, Zeng P, Chen C, et al. Characterization of glutamatergic  
583 VTA neural population responses to aversive and rewarding conditioning in freely-moving mice.  
584 *Science Bulletin*. 2019;64(16):1167-1178.
- 585 20. Lin K, Zhong X, Li L, Ying M, Yang T, Zhang Z, et al. AAV9-Retro mediates efficient  
586 transduction with axon terminal absorption and blood-brain barrier transportation. *Mol Brain*.  
587 2020;13(1):138.
- 588 21. Tervo DG, Hwang BY, Viswanathan S, Gaj T, Lavzin M, Ritola KD, et al. A Designer AAV  
589 Variant Permits Efficient Retrograde Access to Projection Neurons. *Neuron*. 2016;92(2):372-  
590 382.
- 591 22. Li SJ, Vaughan A, Sturgill JF and Kepecs A. A Viral Receptor Complementation Strategy to  
592 Overcome CAV-2 Tropism for Efficient Retrograde Targeting of Neurons. *Neuron*.  
593 2018;98(5):905-917 e5.
- 594 23. Mohebi A, Pettibone JR, Hamid AA, Wong JT, Vinson LT, Patriarchi T, et al. Dissociable  
595 dopamine dynamics for learning and motivation. *Nature*. 2019;570(7759):65-70.
- 596 24. Bostan AC, Dum RP and Strick PL. The basal ganglia communicate with the cerebellum. *Proc*  
597 *Natl Acad Sci U S A*. 2010;107(18):8452-6.
- 598 25. Osakada F and Callaway EM. Design and generation of recombinant rabies virus vectors. *Nat*  
599 *Protoc*. 2013;8(8):1583-601.
- 600 26. Sun L, Tang Y, Yan K, Yu J, Zou Y, Xu W, et al. Differences in neurotropism and neurotoxicity  
601 among retrograde viral tracers. *Mol Neurodegener*. 2019;14(1):8.
- 602 27. Narayan S, Barnard RJ and Young JA. Two retroviral entry pathways distinguished by lipid raft  
603 association of the viral receptor and differences in viral infectivity. *J Virol*. 2003;77(3):1977-83.
- 604 28. Chen YH, Keiser MS and Davidson BL. Adeno-Associated Virus Production, Purification, and  
605 Titering. *Curr Protoc Mouse Biol*. 2018;8(4):e56.
- 606 29. Paxinos G and Franklin K. (2012) Paxinos and Franklin's the Mouse Brain in Stereotaxic  
607 Coordinates, Amsterdam: Elsevier/Academic Press.

608

609

610 **Figures**

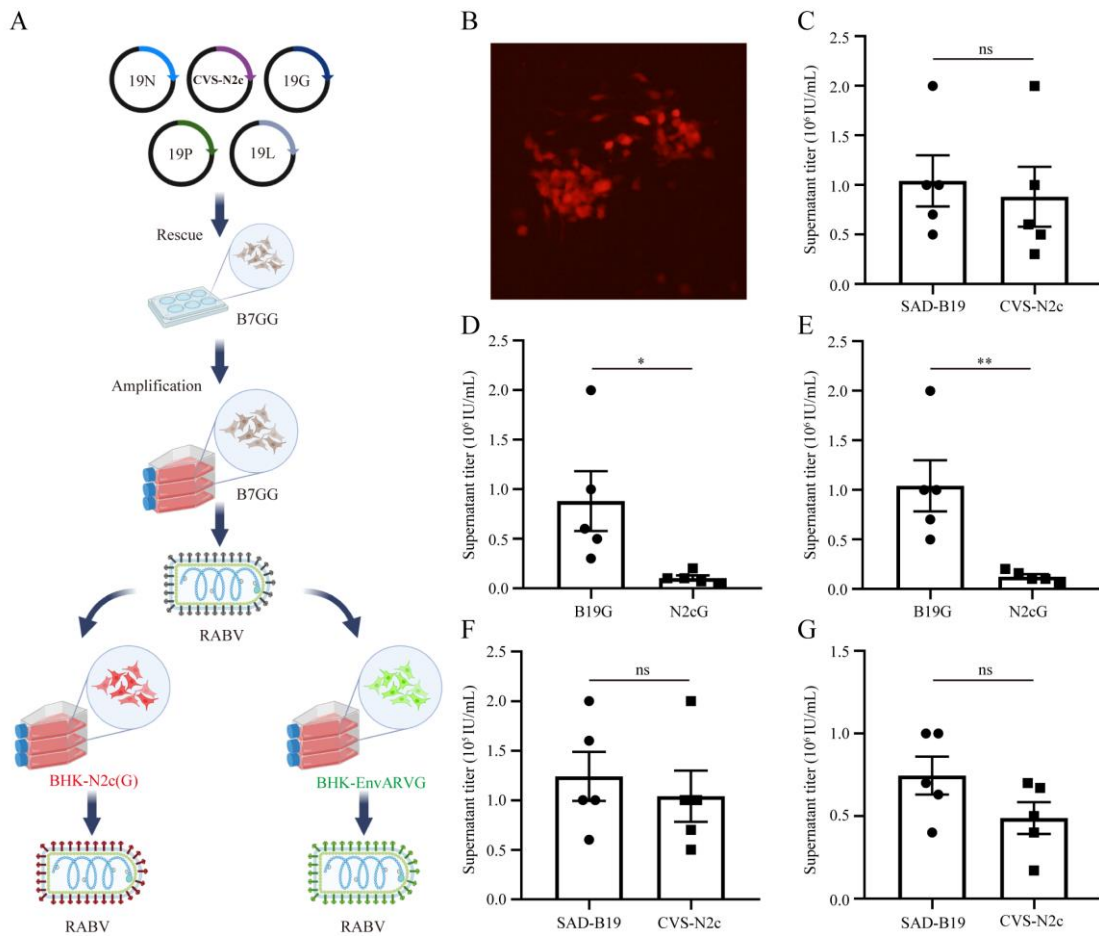

611

612 **Fig. 1 Optimized method for rapid rescue and preparation of CVS-N2c-ΔG virus.** (A)

613 Schematic diagram of virus production process using three different cell lines. “B7GG” cell line for

614 the rapid rescue and amplification of CVS-N2c-ΔG viruses; “BHK-N2cG” cell line for the

615 amplification of N2cG coated CVS-N2c-ΔG viruses; “BHK-EnvARVG” cell line for the

616 amplification of EnvARVG coated CVS-N2c-ΔG viruses. (B) Fluorescent signals (red) of CVS-

617 N2c-ΔG virus on the 5th day of rescue in B7GG cells. (C) Comparison of supernatant titers between

618 CVS-N2c-ΔG and SAD-B19-ΔG viruses produced in B7GG. (D) Comparison of CVS-N2c-ΔG

619 viral supernatant titers produced in B7GG and BHK-N2cG. (E) Comparison of SAD-B19-ΔG viral

620 supernatant titers produced in B7GG and BHK-N2cG. (F) Comparison of supernatant titers between

621 CVS-N2c-ΔG and SAD-B19-ΔG viruses produced in BHK-N2cG. (G) Comparison of supernatant

622 titers between CVS-N2c-ΔG and SAD-B19-ΔG viruses produced in BHK-EnvARVG. Statistical

623 values are indicated as mean  $\pm$  SEM. Significant differences are expressed by the p value. \*P<0.05,

624 \*\*P<0.01, \*\*\*P<0.001, ns, no significant difference.

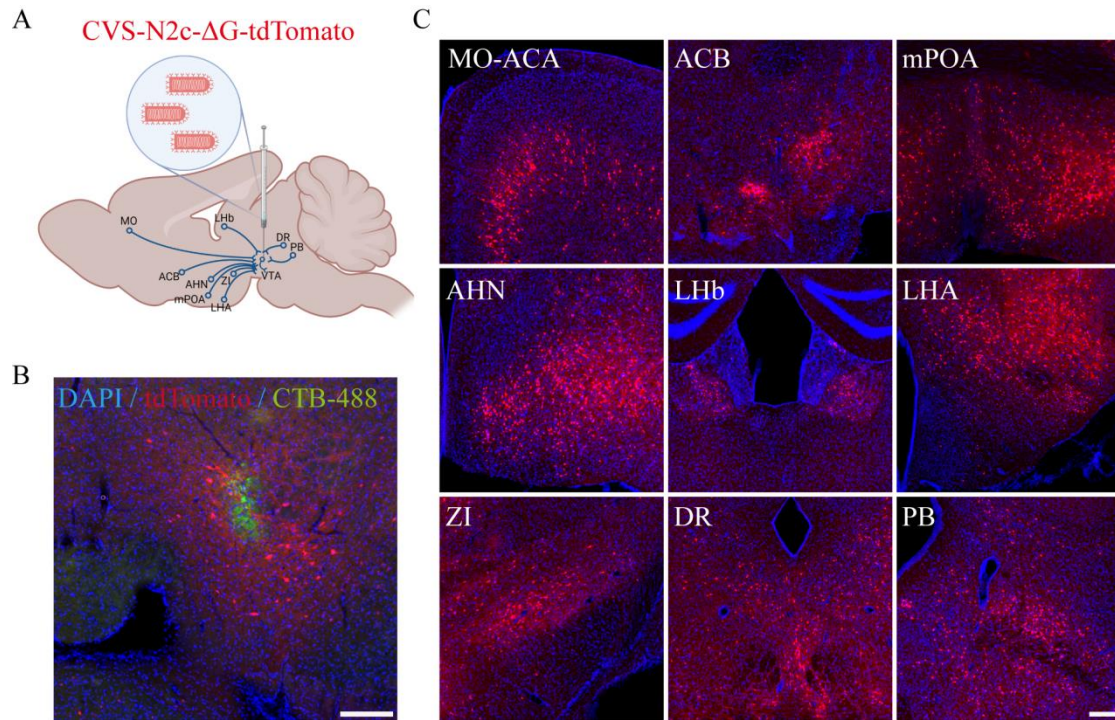

625

626 **Fig. 2 Efficient retrograde labeling with N2cG coated CVS-N2c-ΔG virus.** (A) Schematic  
627 diagram of retrograde infection via N2cG coated CVS-N2c-ΔG virus. (B) N2cG coated CVS-N2c-  
628 ΔG virus could infect a small amount of neurons in injection site VTA. CTB-488 dye (green) was  
629 used to indicate the injection site. (C) N2cG coated CVS-N2c-ΔG virus could efficiently retrograde  
630 infect the upstream brain regions projecting to VTA, including the somatomotor areas (MO),  
631 anterior cingulate area (ACA), medial preoptic area (MPOA), anterior hypothalamic nucleus (AHN),  
632 lateral habenula (LHb), lateral hypothalamic area (LHA), zona incerta (ZI), dorsal raphe nucleus  
633 (DR), and parabrachial nucleus (PB), among others. Scale bars: 100 μm.

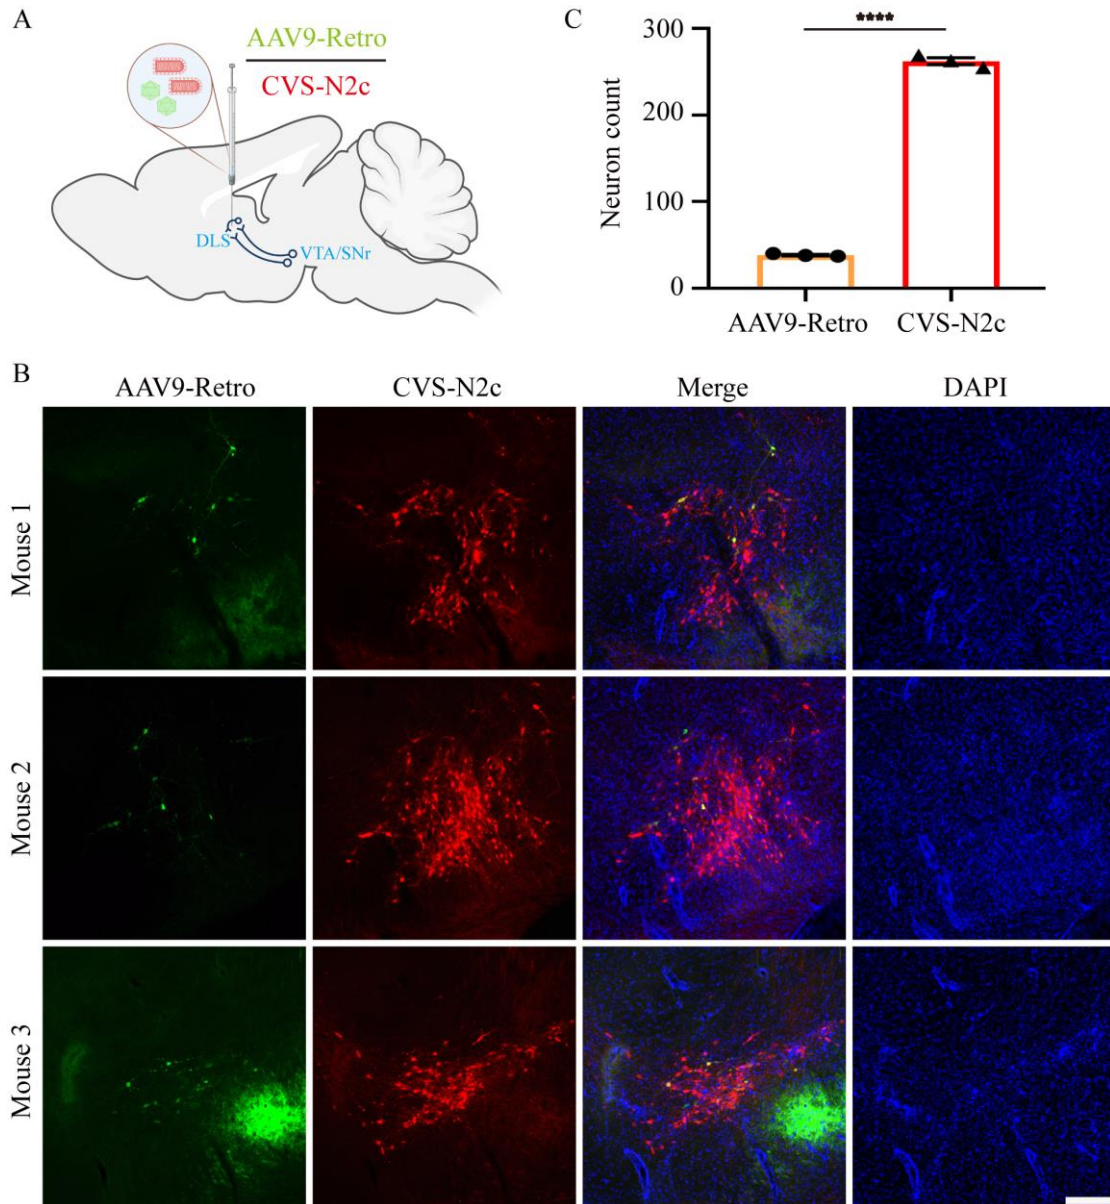

634

635 **Fig. 3 CVS-N2c-AG virus for efficient transduction in VTA/SNc to DLS pathway.** (A)

636 Schematic of CVS-N2c-ΔG-tdTomato and rAAV9-Retro-CAG-EGFP injections in VTA/SNc to

637 DLS pathway. (B) Representative images of CVS-N2c-ΔG-tdTomato (red) and rAAV9-Retro-CAG-

638 EGFP (green) in VTA/SNc. (C) Quantification of positive cells of viruses in VTA/SNc. Statistical

639 values are indicated as mean ± SEM. Significant differences are expressed by the p value. \*P<0.05,

640 \*\*P<0.01, \*\*\*P<0.001, \*\*\*\*P<0.0001, ns, no significant difference. Scale bars: 200 μm.

641

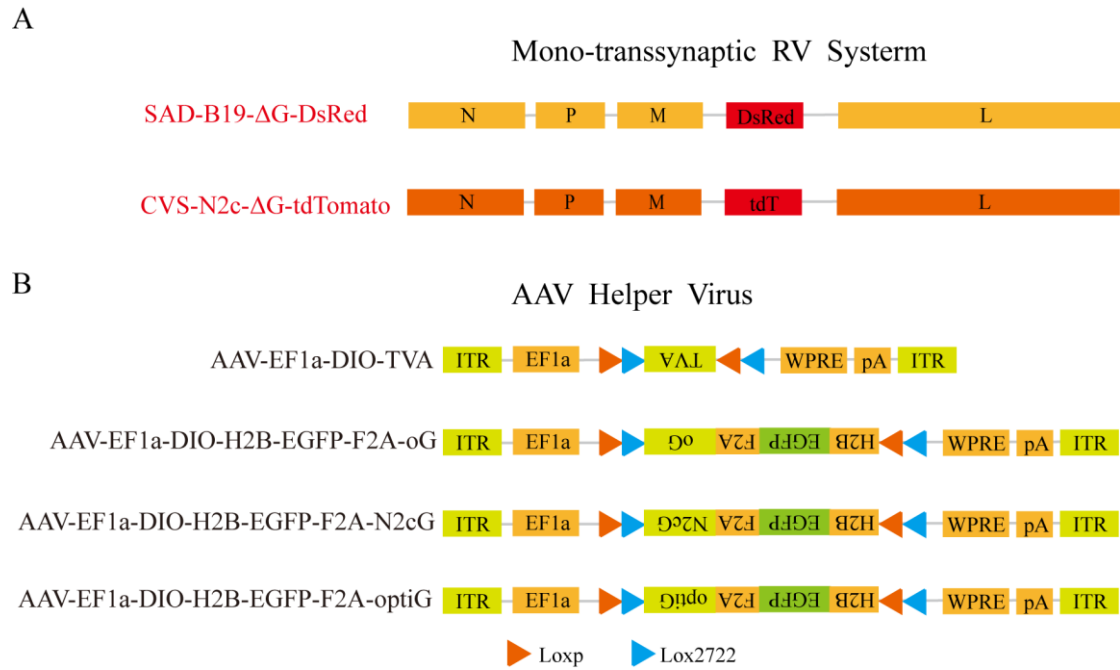

643 **Fig. 4 Establishment of retrograde trans-mono-synaptic systems.** (A) Glycoprotein (RVG)  
 644 deleted rabies virus systems: CVS-N2c-ΔG and SAD-B19-ΔG viral vectors for retrograde trans-  
 645 mono-synaptic tracing. (B) Helper virus systems based on adeno-associated viruses that compensate  
 646 TVA for cell-type specific infection of EnvARVG pseudotyped rabies viruses and glycoproteins for  
 647 trans-mono-synaptic tracing. Different rabies virus systems and different helper virus systems can  
 648 be combined into various retrograde trans-mono-synaptic systems. "tdTomato" is abbreviated as  
 649 "tdT", and optiG is codon-optimized N2cG. LoxP and Lox2722 are elements recognized and cleaved  
 650 by Cre recombinase.

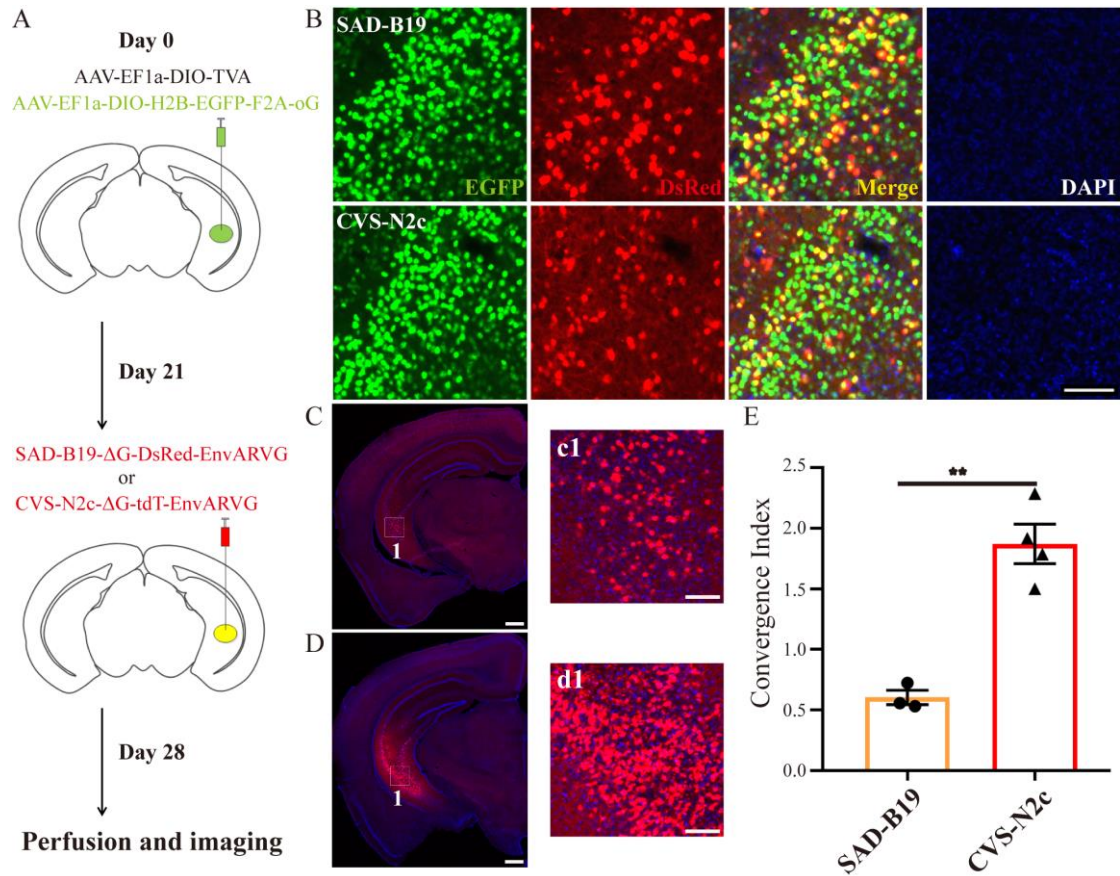

651

652 **Fig. 5 Comparison of retrograde trans-mono-synaptic efficiency following trans-**  
 653 **complementation with oG.** (A) Schematic diagram of virus injection for trans-mono-synaptic  
 654 tracing. The adeno-associated viruses carrying Cre-dependent oG and TVA were injected into the  
 655 ventral hippocampal region (vHPC) of Thy1-CRE transgenic mice. After 3 weeks, EnvARVG  
 656 pseudotyped CVS-N2c-ΔG and SAD-B19-ΔG were injected at the same site respectively. After 1  
 657 week, brain slices were processed and imaged by slide scanner. (B) Starter cells at injection site.  
 658 The green fluorescence signals of oG could be co-labeled with the red fluorescence signals of RV.  
 659 (C) Monosynaptic input neurons in contralateral vHPC labeled by oG mediated SAD-B19-ΔG  
 660 spread. c1 is a partial enlarged view of figure C. (D) Monosynaptic input neurons in contralateral  
 661 vHPC labeled by oG mediated CVS-N2C-ΔG spread. d1 is a partial enlarged view of figure D. (E)  
 662 Convergence indices for long-distance input in contralateral vHPC. Statistical values are indicated  
 663 as mean ± SEM. Significant differences are expressed by the p value. \*P<0.05, \*\*P<0.01,  
 664 \*\*\*P<0.001, ns, no significant difference. Scale bars: 100 μm for figure B/c1/d1; 500 μm for figure  
 665 C/D.



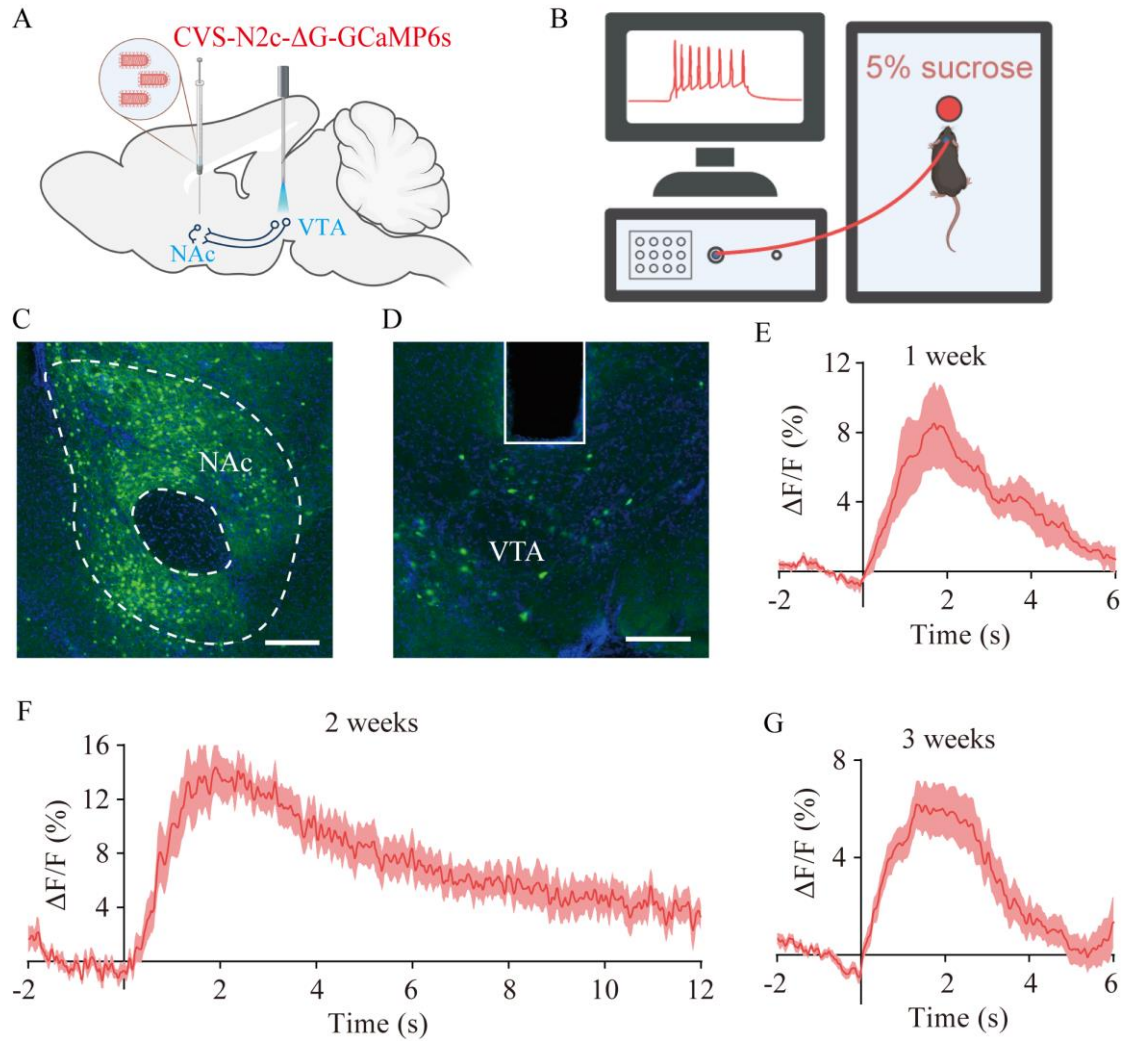

666

667 **Fig. 6 Neuronal activity monitoring in vivo with CVS-N2c-ΔG virus.** (A) Schematic diagram of  
668 virus injection and optical fiber implantation. N2cG coated CVS-N2c-ΔG-GCaMP6s vector was  
669 injected into NAc and optical fiber was implanted into VTA. (B) Schematic diagram of reward  
670 behavior experiment and calcium transient monitoring. (C) Fluorescence signals of neurons in NAc  
671 labeled by CVS-N2c-ΔG-GCaMP6s. (D) Fluorescence signals of projection neurons in VTA labeled  
672 by CVS-N2c-ΔG-GCaMP6s. (E-G) Average of  $\Delta F/F$  signals from reward behavior trials. Scale bars:  
673 200  $\mu\text{m}$ .

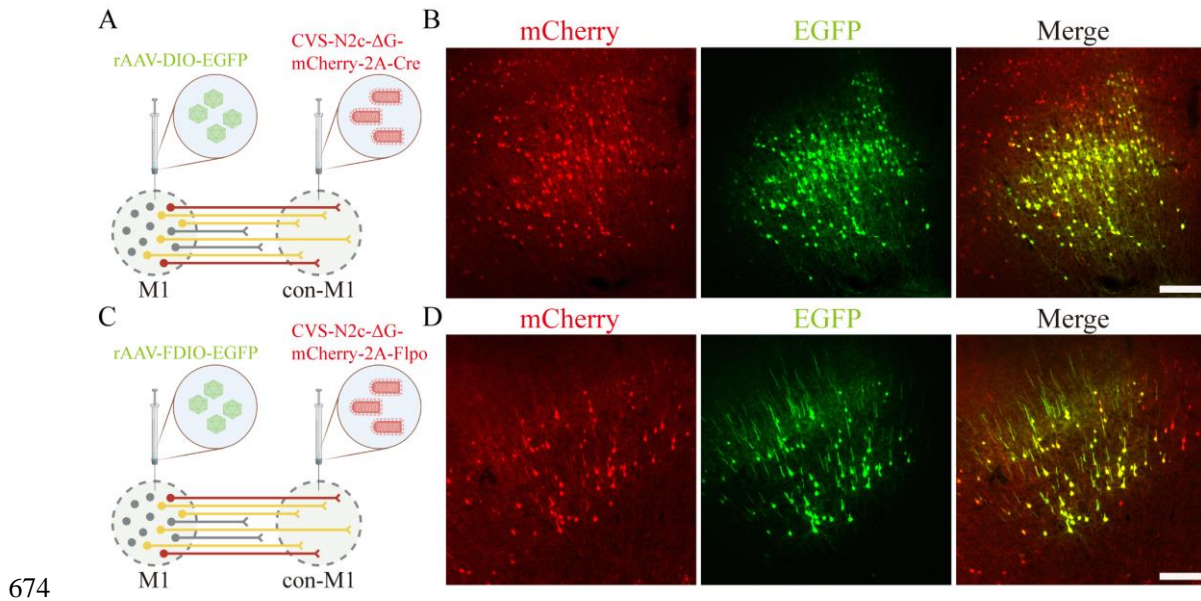

Source: http://biorxiv.org/content/10.1101/2022.01.22.477330v1.full.pdf
